# Supplementary material for: Tunable Complex Permittivity and Strong Microwave Absorption Properties of Novel Dielectric-Conductive ZnO/C Hybrid Composite Absorbents
Source: MDPI journal article supplement (doi:10.3390/met13071220), 2023-07-01
Supplement: s1 [file s1]

Archive with 1 entries (1 files):
- metals-2436846-supplementary.pdf
