# Supplementary material for: Tunable Complex Permittivity and Strong Microwave Absorption Properties of Novel Dielectric-Conductive ZnO/C Hybrid Composite Absorbents
Source: MDPI journal article supplement (doi:10.3390/met13071220), 2023-07-01
Supplement: s1 [file s1 › metals-2436846-supplementary.pdf]

## Article

# Tunable Complex Permittivity and Strong Microwave Absorption Properties of Novel Dielectric-Conductive ZnO/C Hybrid Composite Absorbents

As shown in Figure S1, the real part of the complex permittivity of the samples cured at 180 °C and pre-carbonized at 400 °C is distributed in the range of 0.03–0.07 and 2.47–2.50, respectively. The corresponding imaginary part of the complex permittivity is 0.01–0.09 and 2.71–2.76, respectively.

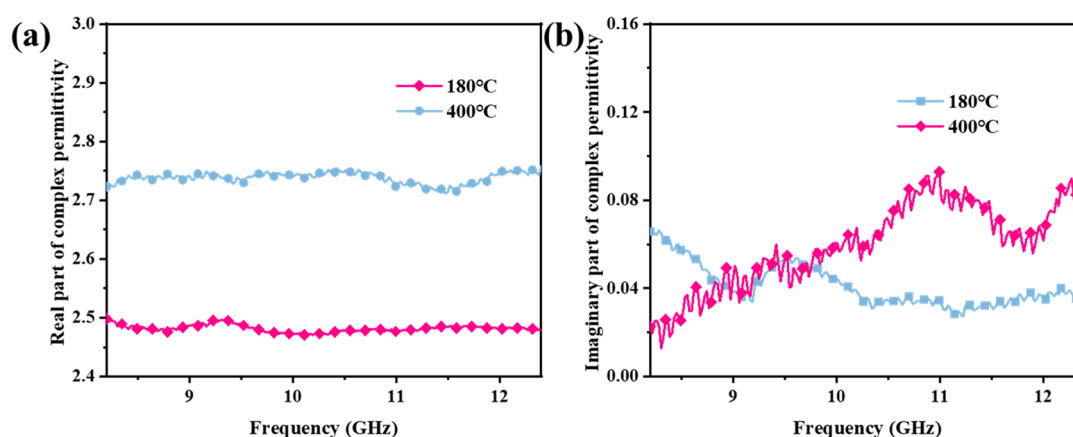

**Figure S1.** Complex permittivity of the samples after curing treatment at 180 °C and pre-carbonization treatment at 400 °C.

As shown in Figure S2, the real and imaginary parts of the complex permittivity of ZnO-filled paraffin composite sample are distributed in the range of 11.02–11.21 and 0.58–1.19, respectively.

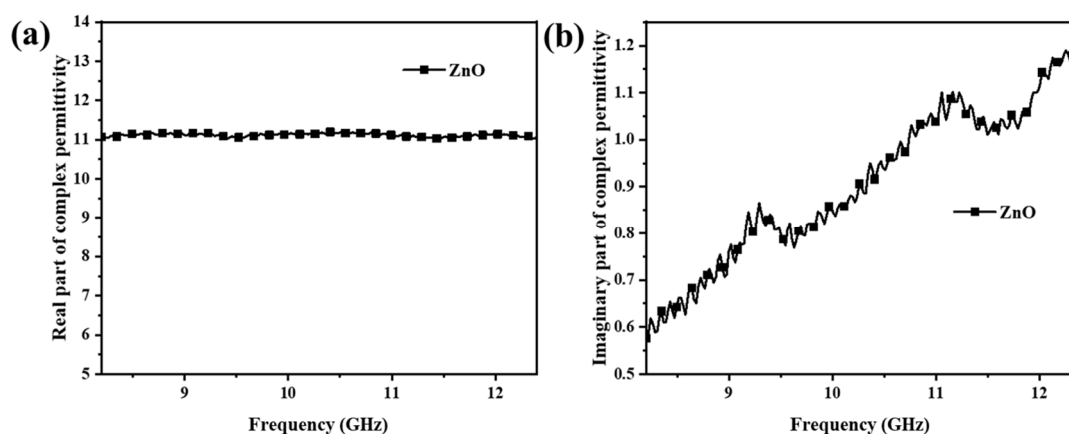

**Figure S2.** Complex permittivity of ZnO-filled paraffin composite sample.
